# Supplementary material
Source: PubMed Central journal article supplement (PMC4656776)
Supplement: ajtr0007-2000-f6.pdf [file ajtr0007-2000-f6.pdf]

## MicroRNA-411 in human chondrocytes

**Table S1.** Primer sequence

| Name             | Sequence (5'-3')                                        |
|------------------|---------------------------------------------------------|
| Ki-67            | TCCTTTGGTGGGCACCTAAGACCTG<br>TGATGGTTGAGGTCGTTCCCTTGATG |
| MMP-13           | TGCTTCCTGATGACGATGTAC<br>TCCTCGGAGACTGGTAATGG           |
| GAPDH            | GACTCATGACCACAGTCCATGC<br>AGAGGCAGGGATGATGTTCTG         |
| Type II collagen | AAGGTGCTTCTGGTCCTGCTG<br>GGGATTCCATTAGCACCATCTTTG       |
| Type IV collagen | ACTCATTCCAACCGTCTGTCAGC<br>GCAAATCATTGACAGTGGCGTCTA     |
